# Supplementary material for: Human TLR8 Senses RNA From Plasmodium falciparum-Infected Red Blood Cells Which Is Uniquely Required for the IFN-γ Response in NK Cells
Source: PubMed Central journal article supplement (PMC6445952; doi:10.3389/fimmu.2019.00371), 2019-03-27
Supplement: Table_1.pdf [file Table_1.pdf]

|                  | InDel TLR7 | Sequence*             | InDel TLR8 | Sequence*              |
|------------------|------------|-----------------------|------------|------------------------|
| <b>THP-1 WT</b>  | -          | CACCATTA/ACCACATAC    |            | AACTTCCTGTA/GTCGACGATT |
| <b>TLR7 #1</b>   | -1 bp      | TCACCATTA.CCACAT      | -          |                        |
| <b>TLR7 #2</b>   | +1 bp      | CACCATTA[+A]ACCACATAC | -          |                        |
| <b>TLR8 #1</b>   | -          |                       | -23 bp     | TTATTG...CAGGAAGTTC    |
| <b>TLR8 #2</b>   | -          |                       | -1 bp      | TCGTCGAC.ACAGGAAG      |
| <b>TLR7/8 #1</b> | +1 bp      | CACCATTA[+A]ACCACATAC | +1 bp      | AATCGTCGAC[+A]TACAGGAA |
| <b>TLR7/8 #2</b> | +1 bp      | CACCATTA[+A]ACCACATAC | 5 bp       | CAGCAATC...CTACAGGAA   |

\* THP-1 are derived from a male patient and therefore carry only one X chromosome/ indicates Cas9 cut site

**Supplementary Table 1**
